# Supplementary material for: Determination of Breast Metabolic Phenotypes and Their Associations With Immunotherapy and Drug-Targeted Therapy: Analysis of Single-Cell and Bulk Sequences
Source: Front Cell Dev Biol. 2022 Feb 14;10:829029. doi: 10.3389/fcell.2022.829029 (PMC8905618; doi:10.3389/fcell.2022.829029)
Supplement: Supplementary file 1 [file Table1.xls]

## Sheet: Sheet1
m6A	lncRNA	cor	pvalue	Regulation
NSUN3	HCG11	0.410601	3.56e-23	postive
NSUN3	C1orf220	0.525672	2.42e-39	postive
TET2	LINC02246	0.482613	1.46e-32	postive
NSUN3	LINC00506	0.530974	3.01e-40	postive
TET2	LINC01691	0.484853	6.81e-33	postive
TET2	TEX41	0.56193	7.4e-46	postive
TET2	LINC02042	0.410693	3.47e-23	postive
NSUN3	MIR583HG	0.58292	5.19e-50	postive
NSUN3	CERNA1	0.569325	2.75e-47	postive
TET2	LINC02234	0.407568	7.93e-23	postive
NSUN3	LINC02603	0.45566	8.74e-29	postive
NSUN3	LINC01684	0.492433	5.02e-34	postive
TET2	LINC02082	0.408145	6.82e-23	postive
NSUN3	LINC01376	0.576348	1.12e-48	postive
NSUN3	LINC01266	0.672432	1.15e-71	postive
TET1	LINC00315	0.41696	6.46e-24	postive
TET2	LINC01449	0.555059	1.46e-44	postive
NSUN3	LINC01878	0.643009	9.55e-64	postive
NSUN3	LINC02099	0.401969	3.41e-22	postive
NSUN3	FOCAD-AS1	0.593099	3.89e-52	postive
TET2	LINC00609	0.547667	3.36e-43	postive
NSUN3	LINC01800	0.417635	5.37e-24	postive
TET1	C15orf54	0.420408	2.52e-24	postive
NSUN3	MAFTRR	0.430494	1.51e-25	postive
TET2	LINC01338	0.464205	6.02e-30	postive
TET2	LINC01344	0.427237	3.78e-25	postive
NSUN3	MIR181A1HG	0.65633	3.2e-67	postive
NSUN3	LINC01293	0.441807	5.71e-27	postive
TET2	LINC00158	0.482313	1.61e-32	postive
TET2	LINC00921	0.410055	4.11e-23	postive
NSUN3	JPX	0.456036	7.78e-29	postive
NSUN3	LINC02410	0.421307	1.97e-24	postive
TET2	LINC02367	0.425992	5.36e-25	postive
TET2	LINC01213	0.436099	3.02e-26	postive
NSUN3	LINC00427	0.603331	2.38e-54	postive
NSUN3	EDNRB-AS1	0.479524	4.1e-32	postive
NSUN7	FAM160A1-DT	0.473923	2.62e-31	postive
NSUN3	LINC02066	0.41995	2.86e-24	postive
NSUN7	LINC01267	0.406603	1.02e-22	postive
TET2	SEMA6A-AS2	0.48372	1e-32	postive
NSUN3	LINC00513	0.639956	5.66e-63	postive
NSUN3	LINC00484	0.561897	7.51e-46	postive
NSUN3	FAM242F	0.45482	1.13e-28	postive
NSUN3	SAMD12-AS1	0.565247	1.71e-46	postive
NSUN3	ZKSCAN2-DT	0.546247	6.09e-43	postive
NSUN3	LINC02316	0.610449	6.14e-56	postive
NSUN3	CARMN	0.686008	1.22e-75	postive
NSUN3	LINC00630	0.705519	9.61e-82	postive
TET2	MIR137HG	0.467755	1.94e-30	postive
NSUN3	LINC02207	0.40283	2.73e-22	postive
NSUN3	LINC02325	0.547467	3.66e-43	postive
NSUN3	LINC01797	0.579213	2.96e-49	postive
NSUN3	SPACA6P-AS	0.4804	3.06e-32	postive
NSUN3	ERVK9-11	0.489962	1.18e-33	postive
NSUN3	LINC02033	0.480728	2.74e-32	postive
NSUN3	LINC00628	0.427451	3.56e-25	postive
NSUN3	IQCH-AS1	0.486908	3.38e-33	postive
NSUN3	LINC02284	0.670524	3.99e-71	postive
NSUN3	RNF139-AS1	0.456916	5.93e-29	postive
NSUN3	LINC00271	0.517128	6.4e-38	postive
TET1	LINC01012	0.481182	2.36e-32	postive
NSUN3	SPATA13	0.557457	5.21e-45	postive
TET2	ATP2B1-AS1	0.405691	1.3e-22	postive
NSUN3	LINC00456	0.552128	5.12e-44	postive
TET1	LINC02147	0.422485	1.42e-24	postive
TET2	LINC01337	0.460218	2.12e-29	postive
TRDMT1	LINC00662	0.706635	4.15e-82	postive
TET2	LINC02398	0.471278	6.21e-31	postive
NSUN3	LINC01535	0.41317	1.79e-23	postive
TET2	LINC02018	0.437539	1.99e-26	postive
NSUN3	CLIP1-AS1	0.682844	1.08e-74	postive
TET2	LINC02324	0.440586	8.18e-27	postive
NSUN3	LINC01290	0.604872	1.09e-54	postive
NSUN3	LINC02433	0.486732	3.59e-33	postive
TET2	LINC02371	0.40242	3.04e-22	postive
TET2	LINC02445	0.474315	2.3e-31	postive
NSUN3	MUC20-OT1	0.585346	1.64e-50	postive
NSUN3	FTX	0.693236	7.64e-78	postive
TET2	LINC01990	0.487303	2.95e-33	postive
NSUN3	LINC01798	0.586404	9.92e-51	postive
TET2	LINC01924	0.493725	3.2e-34	postive
NSUN3	BACH1-IT2	0.660256	2.79e-68	postive
TET2	C21orf91-OT1	0.554976	1.52e-44	postive
TET2	LINC02468	0.590392	1.46e-51	postive
TET1	LINC01410	0.428282	2.82e-25	postive
NSUN3	SEMA5A-AS1	0.540817	5.73e-42	postive
NSUN3	LINC01695	0.477855	7.15e-32	postive
NSUN3	LINC02571	0.408722	5.85e-23	postive
NSUN3	DSCR9	0.415909	8.58e-24	postive
TET1	LINC00243	0.512423	3.74e-37	postive
NSUN3	LINC01422	0.663885	2.84e-69	postive
NSUN3	ARRDC3-AS1	0.626248	1.3e-59	postive
NSUN3	LINC01031	0.454099	1.41e-28	postive
NSUN3	LINC01394	0.437269	2.15e-26	postive
NSUN3	EBLN3P	0.46554	3.94e-30	postive
NSUN3	LINC00562	0.612952	1.66e-56	postive
TET2	LINC00426	0.490436	1e-33	postive
NSUN3	LINC01948	0.443541	3.42e-27	postive
TET2	LINC00862	0.448383	8.04e-28	postive
NSUN7	LINC02166	0.407551	7.97e-23	postive
TET3	LINC00954	0.514941	1.46e-37	postive
NSUN3	LINC00571	0.637257	2.68e-62	postive
NSUN3	MIATNB	0.6356	6.91e-62	postive
NSUN3	NORAD	0.523046	6.68e-39	postive
TRDMT1	LINC00578	0.618368	9.4e-58	postive
TET1	LINC02294	0.41813	4.7e-24	postive
NSUN3	PSD2-AS1	0.557937	4.23e-45	postive
NSUN3	PITPNM2-AS1	0.63975	6.37e-63	postive
NSUN3	OSMR-AS1	0.554979	1.51e-44	postive
TET1	LINC01825	0.462275	1.11e-29	postive
NSUN3	LINC02157	0.62705	8.38e-60	postive
TET1	LINC01960	0.432701	8.04e-26	postive
NSUN3	LINC02595	0.550347	1.09e-43	postive
NSUN3	DUBR	0.514717	1.59e-37	postive
TET2	SALRNA1	0.492678	4.61e-34	postive
NSUN3	LINC00113	0.43782	1.84e-26	postive
NSUN7	ZNF30-AS1	0.423945	9.48e-25	postive
NSUN3	LINC01277	0.441079	7.07e-27	postive
NSUN3	LINC00299	0.530271	3.98e-40	postive
TET2	LINC02276	0.507851	2.03e-36	postive
NSUN3	LINC00244	0.56268	5.32e-46	postive
NSUN3	LINC01876	0.435299	3.81e-26	postive
NSUN3	SRGAP3-AS4	0.53422	8.28e-41	postive
TET2	CXXC5-AS1	0.450617	4.09e-28	postive
NSUN3	EGOT	0.481927	1.83e-32	postive
TET1	LINC01820	0.434897	4.28e-26	postive
NSUN3	LINC01814	0.49191	6.02e-34	postive
TET2	LINC02580	0.43284	7.72e-26	postive
NSUN3	NBAT1	0.621145	2.11e-58	postive
NSUN3	LINC01572	0.453405	1.75e-28	postive
NSUN3	LINC01473	0.656325	3.21e-67	postive
TET2	DPH6-DT	0.432117	9.5e-26	postive
NSUN7	RTCA-AS1	0.41596	8.46e-24	postive
NSUN3	LINC00476	0.435298	3.81e-26	postive
TET2	HCG27	0.482051	1.76e-32	postive
NSUN3	PPFIA2-AS1	0.651192	7.34e-66	postive
TET2	LINC01285	0.449925	5.05e-28	postive
NSUN3	LINC02344	0.661412	1.35e-68	postive
NSUN3	FAM215B	0.4558	8.37e-29	postive
NSUN3	TGFB3-AS1	0.57099	1.3e-47	postive
NSUN3	LINC01091	0.48293	1.31e-32	postive
NSUN3	LINC01534	0.635692	6.56e-62	postive
TET2	LINC01811	0.475252	1.69e-31	postive
NSUN3	TMEM202-AS1	0.620053	3.81e-58	postive
ALYREF	LINC01775	0.419627	3.12e-24	postive
TET2	LINC02242	0.503171	1.11e-35	postive
NSUN3	LINC00311	0.5105	7.64e-37	postive
NSUN7	LINC02363	0.414052	1.42e-23	postive
TET2	LINC01303	0.437255	2.16e-26	postive
TRDMT1	MIR9-3HG	0.741304	2.34e-94	postive
NSUN3	MIR99AHG	0.604659	1.21e-54	postive
TET2	LINC02003	0.426358	4.84e-25	postive
NSUN3	LINC00216	0.67932	1.18e-73	postive
TET2	LINC01891	0.442295	4.95e-27	postive
NSUN3	LINC01655	0.439421	1.15e-26	postive
NSUN7	LINC00663	0.439085	1.27e-26	postive
TET2	LINC00637	0.414366	1.3e-23	postive
NSUN7	LINC02265	0.4289	2.37e-25	postive
NSUN3	CASC15	0.436698	2.54e-26	postive
NSUN3	LINC01099	0.557607	4.88e-45	postive
NSUN3	LINC01727	0.406886	9.49e-23	postive
NSUN3	MIR34AHG	0.521033	1.45e-38	postive
TET2	LINC01050	0.48857	1.91e-33	postive
NSUN3	L3MBTL4-AS1	0.531993	2.01e-40	postive
NSUN3	LINC02408	0.414165	1.37e-23	postive
NSUN3	LINC01126	0.569543	2.49e-47	postive
NSUN3	LINC00472	0.663542	3.53e-69	postive
NSUN7	LINC01908	0.42686	4.2e-25	postive
NSUN3	GMDS-DT	0.716063	2.95e-85	postive
NSUN3	MIR155HG	0.430721	1.41e-25	postive
NSUN3	ZBTB20-AS4	0.709804	3.75e-83	postive
NSUN3	LINC02102	0.441565	6.13e-27	postive
TET2	LINC00457	0.410198	3.96e-23	postive
NSUN3	LINC01355	0.649088	2.6e-65	postive
NSUN3	GAU1	0.444017	2.97e-27	postive
NSUN3	LINC02035	0.534468	7.49e-41	postive
NSUN3	MIRLET7BHG	0.540577	6.32e-42	postive
TET2	CHODL-AS1	0.575542	1.62e-48	postive
NSUN3	BACH1-AS1	0.66578	8.51e-70	postive
NSUN3	LINC02397	0.464245	5.95e-30	postive
NSUN3	MIR29B2CHG	0.647557	6.5e-65	postive
NSUN3	MIR222HG	0.510765	6.92e-37	postive
NSUN3	CNTN4-AS2	0.605838	6.63e-55	postive
NSUN3	LINC01515	0.604875	1.08e-54	postive
NSUN5	MNX1-AS1	0.403446	2.33e-22	postive
