# Supplementary material for: Determination of Breast Metabolic Phenotypes and Their Associations With Immunotherapy and Drug-Targeted Therapy: Analysis of Single-Cell and Bulk Sequences
Source: Front Cell Dev Biol. 2022 Feb 14;10:829029. doi: 10.3389/fcell.2022.829029 (PMC8905618; doi:10.3389/fcell.2022.829029)
Supplement: Supplementary file 3 [file Table3.xls]

## Sheet: Sheet1
train set	futime	fustat	LINC00628	LINC02147	MIR34AHG	riskScore	Risk		test set	futime	fustat	LINC00628	LINC02147	MIR34AHG	riskScore	Risk
TCGA-50-5930	0.772603	1	0	0	0	1.61477	high		TCGA-75-5125	5.55342	1	1.34958	0	0.966446	2.20645	high
TCGA-L9-A7SV	1.54795	0	0	0.0804636	0.353772	1.16854	high		TCGA-50-5051	1.30959	1	0.125601	0	1.07933	1.22921	high
TCGA-05-4397	2.00274	1	0.880409	0	1.29697	1.61526	high		TCGA-55-8092	0.421918	1	0.157207	0.0307263	0.360249	1.43004	high
TCGA-44-8120	0.712329	0	0.159073	0.194318	0.797396	0.808177	low		TCGA-97-A4M2	1.70959	0	0	0.620027	1.0385	0.223526	low
TCGA-91-6840	1.01918	0	0.0943139	0.0921688	0.270157	1.21209	high		TCGA-49-6743	4.4411	0	0.138057	0.202375	0.988641	0.739074	low
TCGA-49-4510	2.45479	1	0	0.264088	0.232222	0.741601	low		TCGA-49-4506	2.73699	1	0.343823	0.0480004	0.703473	1.33731	high
TCGA-86-8054	3.14521	0	0	0.133611	1.04435	0.820952	low		TCGA-55-6972	4.47123	1	0.0962229	0	0.275625	1.55019	high
TCGA-NJ-A7XG	1.69041	0	0.155924	0	2.82869	0.730706	low		TCGA-50-8460	2.27123	0	0	0.200023	0.58629	0.790259	low
TCGA-44-A47A	1.27671	0	0	0.0630517	2.21774	0.69327	low		TCGA-71-6725	0.70137	0	0	0	0.934529	1.21416	high
TCGA-MP-A4T8	0.441096	1	0.142293	0	1.90209	0.963526	low		TCGA-86-8278	2.5863	0	0.157563	0.0307959	2.79825	0.679636	low
TCGA-69-7974	0.50411	0	0.420264	0.0746737	0.328315	1.44495	high		TCGA-44-3918	2.83836	0	0.77778	0.199099	2.5349	0.620264	low
TCGA-05-4396	0.830137	1	0.296245	0.193005	0.565719	0.92583	low		TCGA-55-8085	2.47671	0	0.347291	0.0339393	0.994797	1.27251	high
TCGA-64-5781	4.27123	0	0.431102	0	1.7641	1.14438	high		TCGA-62-A472	2.49315	0	0	0.3435	1.00684	0.473327	low
TCGA-75-5146	6.48767	0	0	0.225527	1.10174	0.630672	low		TCGA-55-7727	0.326027	0	0.322838	0	1.233	1.28172	high
TCGA-86-A4P7	1.13699	0	0.361985	0.303216	0.740633	0.672987	low		TCGA-86-8074	0.0657534	0	0.279018	0.0681681	1.39866	0.995394	low
TCGA-78-7162	8.68219	1	0.161888	0.27686	0.231859	0.770884	low		TCGA-50-6590	3.52877	1	0.0565458	0	0.323945	1.50049	high
TCGA-55-8207	2.67671	0	0.194119	0.379408	1.33451	0.424519	low		TCGA-44-A4SS	1.13699	0	0.838074	0	1.10798	1.67887	high
TCGA-38-7271	2.19178	1	0.0699456	0.341774	0.801422	0.522458	low		TCGA-MP-A4T7	0.457534	1	0.134264	0.0437366	0.512788	1.30473	high
TCGA-75-5147	3.65205	0	0.135143	0.0660347	0.967776	1.0702	low		TCGA-80-5611	7.10959	0	0	0	1.6411	0.9787	low
TCGA-55-8087	1.26575	0	0.0397291	0.0776511	3.07265	0.522875	low		TCGA-MP-A4T4	7.16986	1	0.19662	0.288222	0.985612	0.603503	low
TCGA-86-A4D0	0.317808	1	0.635648	0	0	2.14926	high		TCGA-55-7281	2.38904	0	0.313969	0.0511379	0.449673	1.41378	high
TCGA-49-AARN	3.10959	1	0.255916	0.166731	2.93223	0.473835	low		TCGA-95-7948	1.30411	0	0.0413947	0.12136	2.25288	0.597739	low
TCGA-49-6761	0.969863	0	0.709684	0	1.21971	1.53154	high		TCGA-69-7979	1.11781	0	0.535888	0	2.3537	1.0021	low
TCGA-75-6206	7.09589	0	0.0854422	0.166998	0.978978	0.795864	low		TCGA-78-8660	0.879452	1	0.502089	0	0.898878	1.53846	high
TCGA-86-7955	2.93699	0	0.51336	0.0334456	1.66656	1.11857	high		TCGA-49-6744	4.61096	0	0.211535	0.103362	0.908898	1.02041	low
TCGA-55-8508	1.69041	0	0.194891	0	0.930425	1.32707	high		TCGA-NJ-A55A	0.0410959	0	0.108535	0.848533	0.621787	0.144533	low
TCGA-50-6595	0.517808	1	0.74246	0	0.236304	2.09818	high		TCGA-35-3615	0.0383562	0	0.0296442	0.17382	0.339657	0.926232	low
TCGA-44-7667	3.00548	0	0	0	0.716418	1.29771	high		TCGA-86-8585	0.967123	0	0.131819	0	0.377588	1.52696	high
TCGA-64-1679	6.81644	0	0.0729584	0.0356495	0.731449	1.21332	high		TCGA-50-5939	1.26027	1	0.162995	0.0796441	0.233446	1.30732	high
TCGA-55-6986	8.93425	0	0.167773	0.0819787	0.240289	1.29926	high		TCGA-99-8032	0.120548	0	0.100699	0.196816	0.769188	0.788743	low
TCGA-97-7546	3.52055	0	0	0.166567	1.46468	0.661132	low		TCGA-78-7158	0.490411	1	0	0	0.71441	1.29851	high
TCGA-49-AAR3	5.1863	0	0.620765	0.227492	0.444536	1.01361	low		TCGA-64-1680	3.08493	0	0.147768	0	1.48146	1.09817	high
TCGA-55-6981	3.77808	1	0.453194	0	1.81741	1.13716	high		TCGA-38-4628	4.08767	1	0.0858813	0	1.23001	1.15319	high
TCGA-78-8648	3.31233	1	0	0.130921	1.91872	0.633264	low		TCGA-55-7573	1.33425	0	0.253385	0.165081	1.69355	0.693726	low
TCGA-55-6971	3.83562	0	0.0808568	0.0790177	1.85288	0.769972	low		TCGA-64-1676	4.73425	0	0	0.10705	0.156888	1.1556	high
TCGA-78-7143	13.5918	1	0.400699	0.0559407	1.63969	1.00937	low		TCGA-78-7145	2.26301	1	0.280093	0	0	1.83159	high
TCGA-78-7152	3.32877	1	0.529241	0.206881	0.606393	0.978404	low		TCGA-55-7994	1.65205	0	0.352353	0	0.504647	1.62209	high
TCGA-99-8028	3.06301	0	0.0704884	0.103328	0.80764	0.98782	low		TCGA-J2-8192	2.02466	0	0.0355323	0.208345	3.35875	0.337018	low
TCGA-44-6774	1.80274	0	0.106427	0	0.914564	1.28149	high		TCGA-73-A9RS	0.931507	1	0	0	2.31824	0.796017	low
TCGA-78-7536	0.668493	1	0.10305	0	0.491966	1.45564	high		TCGA-78-7156	2.67397	1	0	0.0642326	1.12964	0.963191	low
TCGA-69-7761	0.509589	0	0.326352	0.212619	0.934816	0.795591	low		TCGA-55-A48Y	1.72603	0	0.24214	0	0.693597	1.45716	high
TCGA-49-AAR2	6.09315	0	0.841508	0	1.10479	1.6831	high		TCGA-55-8616	0.131507	0	0	0	1.12346	1.14615	high
TCGA-62-8395	3.33151	0	0.122849	0.0600272	1.05568	1.05294	low		TCGA-44-7669	1.5726	1	0.129985	0.0423429	1.48934	0.970292	low
TCGA-67-3774	1.05479	0	0	0.321521	0.376965	0.6084	low		TCGA-L4-A4E6	1.19178	0	0.100935	0.246597	0.722804	0.700206	low
TCGA-97-A4M0	1.7863	0	0.110941	0.108417	2.54227	0.584527	low		TCGA-53-7624	2.85753	1	1.0267	0	0.518985	2.18732	high
TCGA-50-5935	1.78904	1	0.305207	0.0745663	1.09281	1.08692	low		TCGA-50-5944	4.79452	0	0.208464	0.0679075	0.995223	1.09138	low
TCGA-44-2661	3.17534	0	0.0787381	0.153894	1.24047	0.758785	low		TCGA-67-3772	1.56986	0	0.167034	0.0816176	0.478461	1.20895	high
TCGA-MP-A4TD	0.841096	1	0.663596	0	0.253445	2.01449	high		TCGA-05-4420	2.49863	0	0.0763812	0.0497626	0.729299	1.17088	high
TCGA-MP-A4T6	4.90411	1	0.267412	0	6.89389	0.222251	low		TCGA-44-2668	2.08493	1	3.2136	0.130714	6.07042	0.757668	low
TCGA-MP-A4T9	3.46575	1	0.267669	0	1.3801	1.19543	high		TCGA-55-7913	1.53699	1	0.218826	0	0.626815	1.47164	high
TCGA-MP-A4SV	7.17808	1	0.221209	0.162133	1.5841	0.712582	low		TCGA-05-4249	4.1726	0	0.37853	0.0411023	0.361426	1.53589	high
TCGA-78-8640	19.3479	0	0	0.119765	2.98388	0.471428	low		TCGA-91-6831	0.849315	0	0	0	0.897965	1.22779	high
TCGA-91-6828	0.884932	0	0.334148	0.217699	1.2762	0.70969	low		TCGA-44-6778	5.10685	0	0.075392	0.294709	0.647868	0.622595	low
TCGA-97-8552	1.71507	0	0	0.0553704	2.10986	0.73136	low		TCGA-99-7458	2.04658	0	0.126583	0.123704	1.57122	0.759896	low
TCGA-97-8176	1.28219	1	0.590156	0	1.50264	1.33133	high		TCGA-J2-A4AD	1.50685	1	0.557192	0	0.736637	1.65711	high
TCGA-MP-A4TC	0.20274	1	0.390935	0.0545776	0.479919	1.43684	high		TCGA-44-2665	3.56438	0	0.143392	0	1.50604	1.08782	low
TCGA-05-4434	1.25205	1	0.182542	0.229359	1.26986	0.643767	low		TCGA-44-8117	1.05479	0	0	0.201603	0.984866	0.696814	low
TCGA-55-8096	1.96986	1	0.210787	0	0.948808	1.32912	high		TCGA-69-7764	1.13425	0	0.146099	0.285551	0.627737	0.662732	low
TCGA-05-4426	2.16712	0	0	0.0313098	3.76267	0.471089	low		TCGA-NJ-A4YG	6.19452	0	0.0575184	0.281051	0.329516	0.705968	low
TCGA-50-6594	1.0137	1	0.864028	0	0.494993	2.04792	high		TCGA-86-A4JF	2.01918	1	0.596555	0	0.65723	1.72807	high
TCGA-L9-A8F4	1.30411	0	0.042945	0.0839364	4.79752	0.304196	low		TCGA-35-5375	0.723288	0	0	0.338155	0.247792	0.605283	low
TCGA-62-A46S	4.52877	1	0.088069	0.129099	0.756806	0.943785	low		TCGA-69-7765	0.452055	0	0.443842	0.0619639	0	1.67012	high
TCGA-55-7903	1.55342	0	0.439037	0	0.943198	1.47536	high		TCGA-50-5055	5.0137	1	0.325687	0.31828	0.699684	0.643903	low
TCGA-55-8090	1.63836	1	0.126915	0.0310072	1.18151	1.09718	high		TCGA-50-6592	2.12877	1	1.95839	0	2.42582	1.85887	high
TCGA-44-5643	2.77534	0	0	0.0732504	1.50294	0.838992	low		TCGA-44-2666	0.265753	1	0.708891	0.371041	6.0188	0.131062	low
TCGA-55-A494	1.31781	0	1.57989	0.0551415	0.646503	2.32781	high		TCGA-44-2657	3.70137	0	0.109058	0.373022	1.09337	0.447364	low
TCGA-44-7670	2.41644	0	1.78094	0.0809503	0.237274	2.6942	high		TCGA-91-6847	2.30685	0	0.310587	0	0.508377	1.59009	high
TCGA-86-8674	2.20822	0	0	0	1.07153	1.16446	high		TCGA-78-7167	7.34521	1	0.0702807	0.103023	1.10723	0.902178	low
TCGA-86-8073	2.0274	0	0.0756799	0.295834	0.325171	0.685036	low		TCGA-62-A46V	6.02466	0	0.11644	0	1.00061	1.25392	high
TCGA-49-4512	2.47945	1	0	0	0.657288	1.32134	high		TCGA-55-8203	1.49863	0	0.152574	0.178925	0.43704	0.93733	low
TCGA-55-6978	0.482192	1	0.462235	0.180689	0.662023	1.0012	low		TCGA-55-6987	5.85479	0	0	0.0694367	0.271369	1.23421	high
TCGA-05-5425	2.41644	0	0.0608403	0.178369	0.871368	0.788978	low		TCGA-05-5715	0.169863	0	2.05681	0.0837512	0.736452	2.59968	high
TCGA-55-8205	1.6411	0	0.219622	0	1.38401	1.16848	high		TCGA-73-4675	2.52603	1	0.278409	0.0604616	2.03803	0.835828	low
TCGA-55-A493	0.0767123	0	0.705295	0.0574378	0.50507	1.6299	high		TCGA-86-7714	1.71233	1	0.228336	0.223142	0.981082	0.729745	low
TCGA-95-7944	1.03288	0	0.164658	0.0643653	0.282993	1.3425	high		TCGA-44-3917	3.2411	0	1.95194	3.46635	1.23687	0.000247583	low
TCGA-55-8091	1.64384	0	0.0394794	0.154326	1.6963	0.647957	low		TCGA-95-7567	1.55616	0	0.258762	0.0316095	0.833859	1.29241	high
TCGA-93-A4JQ	1.4411	0	0.828638	0.0952695	0.558491	1.5317	high		TCGA-91-6829	3.44658	1	0.154137	0	0.220758	1.61797	high
TCGA-69-8254	1.12055	0	0.337169	0.304154	0.594339	0.694149	low		TCGA-67-6217	1.15616	0	0.0635593	0.248455	2.91299	0.35119	low
TCGA-44-A479	1.33151	0	0.327724	0	0	1.87126	high		TCGA-50-5049	8.47671	0	0	0.157379	0.30753	0.964515	low
TCGA-64-1681	3.19726	1	0.0751977	0.0734873	0.430799	1.20293	high		TCGA-55-8620	1.0274	1	0.337031	0.065873	0	1.57519	high
TCGA-55-8302	1.30959	0	0.864982	0	1.23885	1.63279	high		TCGA-64-5779	2.36712	0	0.308267	0.0602512	1.05962	1.14247	high
TCGA-69-7980	1.12603	0	0.652014	0.0749628	0.878897	1.35466	high		TCGA-64-5774	7.33151	0	0.168082	0	0.481462	1.50366	high
TCGA-97-8547	1.8	0	0.163506	0	1.40507	1.13206	high		TCGA-55-5899	2.54795	0	0.689815	0.0674125	0.987968	1.36002	high
TCGA-05-5429	0.753425	1	0.553114	0	0.679013	1.68341	high		TCGA-78-8655	6.46575	0	0.0802462	0.0784211	0.689582	1.09951	high
TCGA-NJ-A55O	0.0356164	0	0.0563845	0	1.29208	1.11664	high		TCGA-55-8514	1.42466	0	0.0586014	0	1.34288	1.10056	high
TCGA-69-8253	1.16712	0	0	0.138359	0.324436	1.0097	low		TCGA-44-6145	1.63014	0	0.0714605	0.13967	0.818779	0.893554	low
TCGA-55-A490	0.271233	1	0.0452577	0	0.777829	1.29982	high		TCGA-44-2656	3.91507	0	0.765531	0.234979	3.25422	0.44992	low
TCGA-NJ-A4YI	0.0109589	1	0.164707	0.0804806	0.235898	1.30443	high		TCGA-55-7728	1.92877	0	0.299797	0	2.18591	0.94847	low
TCGA-05-4422	1	0	0.307948	0.0273585	1.12267	1.22373	high		TCGA-55-1594	3.2274	0	0.157113	0	0.600054	1.44308	high
TCGA-44-6146	1.99452	0	3.39664	0.10727	2.75782	2.40689	high		TCGA-86-7954	1.65753	0	0.189594	0.0370564	1.62925	0.968629	low
TCGA-86-8359	1.21644	1	0.065597	0	0.187899	1.57046	high		TCGA-50-5066	3.95068	0	0.20736	0.299425	0.974191	0.590555	low
TCGA-86-8055	0.339726	1	0.084235	0	0.36193	1.50179	high		TCGA-78-7161	0.79726	1	0	0.143232	0.41983	0.968015	low
TCGA-55-8614	1.46849	0	0.147762	0.0722005	1.90465	0.795453	low		TCGA-55-8299	1.28493	1	0.0485069	0.284422	0.694727	0.623318	low
TCGA-64-5778	3.57534	0	0.0508637	0	1.16557	1.15771	high		TCGA-50-5946	4.43014	0	0.327082	0.188736	0.935044	0.848363	low
TCGA-86-8056	0.380822	0	0.209209	0.327122	1.07868	0.53157	low		TCGA-05-4418	0.750685	1	0.322345	0.0262511	0.384725	1.54728	high
TCGA-38-6178	1.2274	0	0.454674	0	0.325597	1.79387	high		TCGA-44-4112	2.2137	1	0.96855	0.58244	4.89068	0.117979	low
TCGA-78-7166	0.706849	1	0.0963565	0.0235412	0.414012	1.39538	high		TCGA-55-7995	2.43562	0	0.508895	0.0710459	1.97831	0.917795	low
TCGA-73-4670	0.358904	0	0.52546	0.0770264	1.12886	1.1792	high		TCGA-44-2659	3.74521	0	0.0282498	0.248466	0.24276	0.780664	low
TCGA-44-6775	1.93151	0	1.05503	0.358615	5.86503	0.16593	low		TCGA-86-8076	2.72055	0	0.0359694	0.210908	1.13336	0.660152	low
TCGA-62-8399	7.3863	0	0	0.387897	0.142121	0.547147	low		TCGA-49-4501	3.89315	1	0.0830643	0.16235	1.11035	0.773342	low
TCGA-44-3398	3.1863	0	0	0.186318	1.09224	0.702534	low		TCGA-78-7542	0.879452	1	0.38597	0.0685802	0.100508	1.55034	high
TCGA-69-7763	1.89041	0	0	0.0574081	0.841348	1.07115	low		TCGA-MP-A4TI	1.17534	1	0.54811	0.0595159	1.91892	0.98104	low
TCGA-05-4390	3.08493	0	0.147008	0	1.05274	1.25121	high		TCGA-55-8301	1.46301	0	0.244644	0.0398467	0.46718	1.40492	high
TCGA-55-A4DF	1.20548	1	0.681487	0.0554989	0.325347	1.7123	high		TCGA-55-6975	0.323288	1	0.095875	0.0936944	0	1.31178	high
TCGA-55-6983	7.73425	0	0.0356006	0.104373	0.611855	1.02942	low		TCGA-MN-A4N5	0.230137	0	0.552423	0.269929	2.76917	0.431644	low
TCGA-53-A4EZ	2.93425	0	1.09595	0.0357006	0.83714	1.86104	high		TCGA-49-4494	2.96164	1	0.922948	0.081996	0.480679	1.6957	high
TCGA-44-6147	2.31507	0	0.403646	0.840525	3.45552	0.0710288	low		TCGA-35-4123	0.49863	0	0.478258	0.0424891	0.871782	1.36963	high
TCGA-44-3919	2.81096	1	0.321057	0.0348616	0.715282	1.36616	high		TCGA-55-7724	1.93151	0	0	0.178653	0.78548	0.787463	low
TCGA-55-7227	2.60822	1	0.0647142	0.126485	0.55611	0.999875	low		TCGA-50-5936	0.70411	1	0.380494	0.18592	0.544952	0.986239	low
TCGA-64-1678	3.25753	0	0	0	0	1.61477	high		TCGA-44-7672	1.96986	0	0.264367	0.0645886	0.378632	1.36289	high
TCGA-J2-A4AE	2.95616	0	0.16157	0.157895	1.38842	0.744806	low		TCGA-05-4384	1.16712	0	0.0797173	0	2.5118	0.777761	low
TCGA-44-6148	1.92877	0	0.0615729	0.661897	1.41098	0.183357	low		TCGA-49-4488	2.38082	1	0	0	0.717543	1.29727	high
TCGA-86-A4P8	2.20548	0	0.0527084	0.206038	1.35882	0.629074	low		TCGA-55-1592	1.92055	1	0.0604652	0.11818	1.38559	0.792246	low
TCGA-44-6779	1.36986	1	0.397143	0	0.568798	1.62302	high		TCGA-91-6835	0.216438	0	0.879451	0.595003	1.55024	0.303689	low
TCGA-73-4662	6.89041	0	0.196218	0.0547873	1.2847	1.02916	low		TCGA-49-AARR	13.6767	0	0.0520141	0.304987	2.08588	0.386486	low
TCGA-97-A4M7	1.72329	0	0.510866	0.166415	1.21945	0.896932	low		TCGA-97-A4LX	1.68219	0	0.0506824	0.148589	1.45177	0.712541	low
TCGA-91-7771	1.34795	0	0.123563	0	0.17697	1.61734	high		TCGA-75-6212	4.15342	1	0	0	1.72918	0.952749	low
TCGA-J2-A4AG	2.70685	0	0.62646	0.0680235	0.598153	1.48632	high		TCGA-78-8662	9.20822	1	0.533261	0	0.218214	1.92031	high
TCGA-S2-AA1A	1.40548	0	0.439433	0.107359	1.41607	0.958166	low		TCGA-67-6216	0.386301	0	0	0.0611879	1.07609	0.987073	low
TCGA-49-AARO	10.2986	0	0.172685	0.22501	0.824413	0.742826	low		TCGA-05-5420	1.25205	0	0	0.180606	0.352917	0.893878	low
TCGA-44-2662	3.50685	0	0.822166	0.0887314	8.22835	0.149687	low		TCGA-97-A4M3	1.47945	0	0.0519017	0.101442	0.446008	1.09941	high
TCGA-95-8039	2.27397	0	0.237688	0.0995494	1.36169	0.908488	low		TCGA-97-A4M5	1.73699	0	0	0.179406	0.78879	0.785084	low
TCGA-75-6214	3.05479	1	0.706974	0	0.253136	2.05438	high		TCGA-55-1596	5.65753	0	0.699159	0	2.0027	1.20038	high
TCGA-78-7149	10.7945	0	0.227024	0.133116	0.130059	1.20336	high		TCGA-78-7148	1.71507	1	0.267046	0.0521944	0.305975	1.4422	high
TCGA-05-4389	3.75068	0	0.924868	0	0.953724	1.82983	high		TCGA-MN-A4N1	2.26575	0	0.0406933	0	1.16564	1.1524	high
TCGA-49-4487	2.34247	1	0.0785042	0.153437	0	1.10912	high		TCGA-44-8119	0.780822	0	0.143943	0.168803	0.907095	0.831176	low
TCGA-MN-A4N4	3.21918	0	0.440622	0	1.54261	1.22964	high		TCGA-75-7025	9.05479	0	0.0696675	0.272332	3.29272	0.294203	low
TCGA-78-7147	1.60548	1	0.358776	0.087654	0.770771	1.18608	high		TCGA-50-8459	3.06575	0	0.104437	0.357215	0.747883	0.517517	low
TCGA-55-8206	2.43288	0	0	0.0707525	1.65907	0.805331	low		TCGA-62-8402	4.10411	1	0.243425	0	1.91751	1.00364	low
TCGA-4B-A93V	0.821918	1	0	0	1.47226	1.03044	low		TCGA-55-8204	1.41096	0	0	0.075737	0.443987	1.1513	high
TCGA-55-7911	1.47123	0	0.659485	0	0.858662	1.67172	high		TCGA-55-6712	0.468493	1	0	0.250003	0	0.826657	low
TCGA-55-6979	0.649315	1	0.143159	0.0699515	0.820142	1.11183	high		TCGA-55-7907	0.939726	1	0.96147	0.0783001	0.459013	1.75405	high
TCGA-55-8097	1.30411	0	0.0366129	0.357801	1.36338	0.415368	low		TCGA-78-7535	2.6	1	0.100961	0.0246661	0.433795	1.38568	high
TCGA-05-4403	1.58356	0	0.473791	0.170584	1.28572	0.854844	low		TCGA-55-6984	2.08219	1	0.272973	0.0666911	0.586437	1.27691	high
TCGA-55-6543	1.19178	0	0	0	1.66965	0.970211	low		TCGA-50-6591	0.326027	1	0.0825378	0	0.236425	1.55922	high
TCGA-38-4630	2.93973	1	0	0.0587204	1.37693	0.906474	low		TCGA-86-8668	1.1589	0	0	0.0890275	2.87044	0.529906	low
TCGA-67-4679	1.2274	0	0	0.057315	2.85595	0.579437	low		TCGA-38-4625	8.14521	0	0.764003	0.102983	0.528245	1.4709	high
TCGA-69-8453	2.2274	0	0.497577	0.097252	1.56781	0.964826	low		TCGA-91-6830	0.164384	0	0.0968602	0.283971	1.38725	0.516313	low
TCGA-91-8499	0.0986301	0	0.0794986	0.0776905	0.455439	1.18284	high		TCGA-50-5072	0.684932	1	0.989359	0.0508872	0.596624	1.83291	high
TCGA-44-7659	1.89315	0	0	0.250542	1.46873	0.527323	low		TCGA-78-7154	1.62466	1	0.844662	0.0589607	0.518462	1.72124	high
TCGA-05-4415	0.249315	1	0.11683	0	0.669308	1.38754	high		TCGA-38-4626	10.0658	0	0.0236509	0.0462259	1.0162	1.05757	low
TCGA-86-A456	2.45479	0	0.0649618	0	1.48863	1.05571	low		TCGA-44-6777	2.70411	1	0	0.0537712	1.10326	0.998562	low
TCGA-95-A4VK	1.78356	0	0.22864	0.11172	1.96478	0.728584	low		TCGA-38-4629	2.36712	1	0.259971	0.0282287	0.57919	1.41032	high
TCGA-97-8174	0.449315	1	0	0.275311	1.7036	0.459351	low		TCGA-97-8177	1.36712	0	0.388445	0.0632684	1.2054	1.12377	high
TCGA-05-4433	2	0	0.251044	0.163556	0.479402	1.00784	low		TCGA-55-7726	1.7863	0	0	0	0.531124	1.3732	high
TCGA-67-3773	1.16986	0	0	0.313115	0.229444	0.650899	low		TCGA-55-A48Z	1.78356	0	0.19562	0.0477928	0.840516	1.2005	high
TCGA-93-7348	1.45479	0	0.45064	0.0550488	0.322708	1.54652	high		TCGA-78-7537	4.44384	1	0.0647191	0.0316235	0.463461	1.32605	high
TCGA-73-4677	0.10411	1	0.0567273	0.304904	0.406231	0.646727	low		TCGA-78-7163	19.8575	0	0	0.0394169	0.577677	1.21819	high
TCGA-44-A4SU	1.12055	1	0	0	2.34466	0.789624	low		TCGA-38-A44F	0.364384	0	0.105227	0.257084	0.150708	0.812224	low
TCGA-73-4668	1.27945	0	0.20717	0.0253072	1.11267	1.17953	high		TCGA-67-3770	1.67123	0	0	0	0.244463	1.49871	high
TCGA-73-4659	1.94795	1	0.0239906	0.164115	1.09952	0.751995	low		TCGA-93-8067	0.509589	0	0.157482	0.0923399	0.992414	0.999927	low
TCGA-55-6642	6.70959	0	0.173437	0.112995	0.4968	1.1085	high		TCGA-86-8279	2.6	0	0.153462	0	1.42865	1.11888	high
TCGA-MP-A4SY	4.11233	1	0.22166	0	0.634934	1.46987	high		TCGA-93-A4JO	0.090411	1	0	0.160962	0.314532	0.953263	low
TCGA-L4-A4E5	1.58356	0	0.271382	0.0442015	1.03648	1.18133	high		TCGA-38-4632	3.71781	1	0.0790322	0	0.452767	1.45732	high
TCGA-95-7562	0.238356	1	0.614933	0.0375591	1.21099	1.33072	high		TCGA-78-7155	3.20822	1	0	0	0	1.61477	high
TCGA-97-A4M1	1.64658	0	0.0999152	0.146464	1.71721	0.675658	low		TCGA-L9-A443	0.528767	1	1.37447	0.366331	0.536878	0.953653	low
TCGA-91-8497	1.18904	1	0	0.266045	1.55962	0.492041	low		TCGA-91-A4BC	0.120548	0	0.0991573	0.096902	0.284031	1.19436	high
TCGA-NJ-A55R	1.65205	0	0.437654	0.0814666	1.07455	1.13885	high		TCGA-55-6985	3.37808	0	0.208873	0.408245	0.39887	0.526284	low
TCGA-93-A4JN	1.96712	0	0.154069	0.150565	1.61818	0.705762	low		TCGA-86-8673	2.36164	0	0.482453	0	0.690979	1.6248	high
TCGA-67-3771	1.67123	0	0.223801	0	1.49582	1.13141	high		TCGA-86-8669	2.56986	0	0.0739363	0	2.11786	0.874818	low
TCGA-93-7347	1.87123	0	0.12407	0.161664	0.829245	0.859864	low		TCGA-97-8171	1.55616	0	0.329047	0	1.64944	1.13195	high
TCGA-71-8520	0.575342	1	0.860538	0	1.23248	1.6327	high		TCGA-83-5908	2.25753	0	0.719926	0.100507	0.589197	1.42487	high
TCGA-O1-A52J	4.92603	1	0	0	1.5919	0.993504	low		TCGA-05-4424	2.50137	0	0.258561	0.442191	0.555476	0.46848	low
TCGA-55-6970	1.27123	1	0	0.112083	0.547545	1.01202	low		TCGA-91-A4BD	1.65205	0	0	0.18963	0.370551	0.867851	low
TCGA-05-4432	2.08493	0	0.123724	0.060455	1.9492	0.80108	low		TCGA-49-AARE	3.36712	1	0.427262	0.0347954	1.12188	1.26604	high
TCGA-MP-A5C7	6.1589	0	0.303188	0.380947	1.861	0.378136	low		TCGA-73-4676	0.769863	1	0.476426	0.0581987	0.682347	1.39019	high
TCGA-35-4122	0.616438	0	0.25763	0.251771	0.421696	0.812306	low		TCGA-49-4514	4.65753	0	1.22363	0.0854145	0	2.22744	high
TCGA-73-7498	3.25753	0	0.067212	0.295575	2.50282	0.351399	low		TCGA-55-8507	1.14521	0	0.506162	0.0618312	0.906171	1.30316	high
TCGA-49-4505	1.1726	1	0.0724111	0.212292	0.691392	0.765098	low		TCGA-05-4417	1.24658	0	0.337586	0.131963	0.966995	0.98273	low
TCGA-55-8094	1.48219	0	0.19647	0.192001	1.26625	0.716771	low		TCGA-69-7760	0.553425	0	0.323373	0.135436	0.793956	1.01988	low
TCGA-86-7953	2.73151	0	0.38786	0.0421154	1.23445	1.17847	high		TCGA-69-7973	0.630137	0	0.371033	0.0362594	0.743963	1.37987	high
TCGA-97-7552	5.29315	0	0.236228	0.415539	0.947326	0.441981	low		TCGA-55-A4DG	1.66575	0	0.111101	0.162861	1.27297	0.744227	low
TCGA-97-A4M6	1.55616	0	0.225106	0.384976	1.93441	0.353168	low		TCGA-69-8255	0.353425	0	0	0.852887	0.608085	0.13662	low
TCGA-55-A491	1.71507	0	0.511197	0.090831	0.266236	1.46909	high		TCGA-78-7160	1.90959	1	0.291633	0.21375	0.417683	0.914361	low
TCGA-55-8089	1.92329	1	0.46058	0.138494	0.507425	1.17426	high		TCGA-49-AAQV	1.85479	1	0.0964207	0	1.65715	1.01709	low
TCGA-99-8033	1.79726	1	0.608754	0.066101	1.35624	1.17608	high		TCGA-69-7978	0.367123	0	0.15723	0.268894	1.23853	0.57803	low
TCGA-97-7937	1.54521	0	0.0838547	0.0819475	0.600493	1.121	high		TCGA-44-7660	1.62192	0	0.116825	0.152224	0.557732	0.954932	low
TCGA-55-7574	2.72603	1	0.175411	0.342843	1.25614	0.475507	low		TCGA-86-8358	1.78904	0	0.93992	0.183708	0.53847	1.2785	high
TCGA-78-7633	4.1863	1	0.197346	0.128571	0.282643	1.14727	high		TCGA-50-5068	4.10685	1	0	0.576517	0.844917	0.266433	low
TCGA-49-6767	1.85479	0	1.09657	0	0.418807	2.32721	high		TCGA-49-AAR9	0.712329	1	1.99639	0	0.504579	3.39826	high
TCGA-55-8208	1.84658	0	0.111846	0.109302	1.38829	0.829596	low		TCGA-55-7816	1.28219	1	0	0.0887903	0.910889	0.964129	low
TCGA-50-5932	3.38356	1	0.211781	0.103482	0.758293	1.06817	low		TCGA-62-A46Y	1.13425	1	0.156533	0.050991	0.597842	1.2594	high
TCGA-62-A471	3.4137	0	0.782731	0.0509952	1.19578	1.39077	high		TCGA-62-A46R	4.72603	1	0.101427	0	0.581063	1.41556	high
TCGA-78-7146	0.473973	1	0.366293	0.119321	0.699484	1.11736	high		TCGA-MP-A4TF	0.920548	1	0.35675	0	1.27736	1.28393	high
TCGA-55-8619	1.13973	0	0.049827	0.146081	0.856359	0.85992	low		TCGA-55-6980	5.77808	0	0.0945096	0.09236	1.08287	0.94549	low
TCGA-MP-A4TE	2.45479	1	0.0799455	0	1.2595	1.13981	high		TCGA-44-5645	2.33425	0	0.0391569	0.58422	8.47433	0.0259003	low
TCGA-55-7284	0.665753	1	1.02595	0.111401	1.41496	1.23443	high		TCGA-95-7039	3.48493	0	0.08172	0.159723	0.234082	1.0169	low
TCGA-49-AAR0	13.0548	0	0.27756	0.135624	0.662547	1.03942	low		TCGA-MP-A4TK	1.59452	1	0.152688	0	1.16631	1.21169	high
TCGA-80-5608	7.7589	0	0.172244	0	0.296029	1.59417	high		TCGA-50-6673	0.060274	1	0.0605953	0.0592171	0.520715	1.20801	high
TCGA-55-7914	0.512329	1	0.221607	0.0541416	1.11087	1.09959	high		TCGA-55-A492	1.63288	0	0	0.12934	0.12637	1.09882	high
TCGA-55-7283	1.66849	0	0.0587265	0.172172	0.841094	0.808857	low		TCGA-55-8615	1.22192	0	0.0534818	0	0.919174	1.24957	high
TCGA-55-8513	2.16712	0	0.162794	0	0.699473	1.40355	high		TCGA-49-AARQ	18.4438	0	0.306905	0	2.08789	0.980395	low
TCGA-78-7220	2.21096	1	1.47238	0	0	3.13147	high		TCGA-64-5775	0.169863	1	0	0	0.178415	1.52922	high
TCGA-49-4486	6.35068	1	0.025111	0.0245398	0.863147	1.17516	high		TCGA-L9-A444	0.841096	0	0	0	0.504043	1.38459	high
TCGA-50-5045	5.95616	1	0.0752717	0.183899	0.970252	0.759188	low		TCGA-55-A57B	1.49589	0	0.316018	0.176475	2.19838	0.593303	low
TCGA-64-1677	1.72055	1	0.178811	0.0873718	1.02439	1.01316	low		TCGA-62-8397	3.53151	0	0.0932523	0	1.6027	1.03266	low
TCGA-95-8494	0.230137	0	0.554733	0.232336	1.135	0.786767	low		TCGA-86-8672	0.0520548	1	0.629096	0.0768485	0.675754	1.41932	high
TCGA-50-7109	0.843836	1	0.0534138	0.156597	0.459003	0.945325	low		TCGA-91-6848	0.613699	0	0.102173	0.199698	0.585338	0.828387	low
TCGA-L9-A50W	1.21096	1	0.167977	0.123118	1.56377	0.777159	low		TCGA-78-7150	1.82466	1	1.36565	0.116052	1.53072	1.37114	high
TCGA-05-4430	2.08493	0	0.0718345	0.210602	0.823064	0.738113	low		TCGA-55-8621	1.41096	0	0	0.209229	0.766591	0.729744	low
TCGA-86-7701	2.59452	0	0.103215	0.201735	0.591307	0.822768	low		TCGA-44-7671	2.43562	0	0.074022	0.253184	0.212032	0.794309	low
TCGA-86-6562	1.03014	1	0.553017	0.0675548	0.198011	1.6268	high		TCGA-55-7725	1.21096	0	0	0.392482	0.575204	0.473569	low
TCGA-MP-A4TJ	0.928767	1	0.0794598	0.232958	0.682825	0.728104	low		TCGA-L9-A5IP	0.158904	1	0.37652	0.0459946	0.539261	1.43454	high
TCGA-55-7815	2.11781	0	0.223144	0	0	1.78527	high		TCGA-44-A47G	0.961644	0	0.15828	0.0515602	0.755643	1.19931	high
TCGA-62-8394	0.380822	1	2.30957	0.147198	0.71909	2.47059	high		TCGA-86-6851	0.490411	0	0.283157	0.083015	0.64887	1.20473	high
TCGA-NJ-A4YQ	3.92329	0	0.053274	0.0520623	0.457801	1.25112	high		TCGA-50-5941	4.03836	0	0.0714015	0	0.613576	1.38279	high
TCGA-62-8398	1.21644	1	0.563115	0.0917179	0.268835	1.49905	high		TCGA-86-8280	1.92055	0	0.0838204	0.245742	2.64109	0.38787	low
TCGA-50-6593	0.920548	1	0.148294	0	0.42478	1.51633	high		TCGA-38-4627	3.14247	1	0.118168	0.23096	0.789797	0.720948	low
TCGA-86-8671	2.29863	0	0.0591747	0.115657	1.01702	0.892036	low		TCGA-78-7153	9.9589	0	0.183357	0.13439	0.787824	0.962108	low
TCGA-NJ-A4YF	5.92055	0	0	0	0.397237	1.43045	high		TCGA-MP-A4SW	4.87123	1	0.0908541	0.0443938	2.34222	0.730899	low
TCGA-55-8505	1.20548	0	0.601899	0	0.957836	1.58042	high		TCGA-55-8506	0.030137	0	0	0	1.75137	0.946318	low
TCGA-49-4507	0.734247	1	0.318601	0.0259462	0.760511	1.37847	high		TCGA-J2-8194	1.98356	0	0.356809	0	2.04412	1.01613	low
TCGA-97-7553	5.12329	0	0.100621	0.24583	1.297	0.588804	low		TCGA-NJ-A4YP	0.136986	0	0.600978	0	0.717278	1.70008	high
TCGA-49-6745	1.43014	0	0.199329	0	0.761288	1.40015	high		TCGA-97-7938	0.0493151	1	0.392309	0.230032	0.449499	0.90705	low
TCGA-55-6982	2.72603	1	0.538603	0	0.771399	1.62597	high		TCGA-05-5428	1.83562	0	0.0717068	0.140152	0.616201	0.949407	low
TCGA-50-6597	3.47397	1	0.220568	0.0718504	0	1.47106	high		TCGA-78-7540	3.27945	1	1.05581	0.0303468	0.1779	2.26724	high
TCGA-55-8512	1.66301	1	0	0.223894	2.13284	0.462458	low		TCGA-05-5423	0.413699	0	0.209579	0.204812	0	1.02525	low
TCGA-73-4658	4.38356	1	0.321189	0	0.920028	1.40911	high		TCGA-MP-A4TA	2.60274	1	1.56083	0	1.76127	1.9039	high
TCGA-55-8511	1.51233	0	0.0610499	0	0.349748	1.49174	high		TCGA-91-6836	1.14247	0	0.246208	0	1.05787	1.30626	high
TCGA-93-A4JP	1.58356	0	0.338193	0.188858	0.830344	0.880004	low		TCGA-55-8510	1.47671	0	0.231914	0	0.664306	1.46349	high
TCGA-75-7027	8.38082	0	0.772923	0.188836	0.461249	1.19769	high		TCGA-97-8175	1.50959	0	0.375938	0	0.646113	1.57013	high
TCGA-44-2655	3.6274	0	0.16495	0.161198	0.236245	1.05084	low		TCGA-MP-A4TH	2.03014	0	0.242671	0.0474304	0.973165	1.17868	high
TCGA-05-4405	1.67123	0	0.250168	0	1.43318	1.167	high		TCGA-97-8179	1.19178	0	0	0	0.89257	1.22981	high
TCGA-73-4666	2.19178	0	1.25888	0.32375	0.854053	0.921101	low		TCGA-05-4398	3.92055	0	0.142878	0.0698144	1.09138	1.02377	low
TCGA-95-A4VN	1.51507	0	0.82633	0.151413	1.03555	1.13817	high		TCGA-62-A46P	1.6274	1	0.0693176	0.135482	0.59567	0.966357	low
TCGA-50-5942	5.06027	0	0.0672751	0.197235	1.73435	0.57813	low		TCGA-44-5644	2.36438	0	0.366746	0	0.210104	1.78614	high
TCGA-05-4250	0.331507	1	2.00477	0	0.23439	3.70421	high		TCGA-05-4402	0.668493	1	0.181718	0	0.743603	1.39661	high
TCGA-86-8075	1.90137	1	0.155978	0.076215	0.781881	1.11257	high		TCGA-49-4490	1.05479	1	0.337637	0	1.20893	1.2998	high
TCGA-97-7547	5.38356	0	0.194928	0.476235	0.558359	0.415221	low		TCGA-44-A47B	0.786301	0	0.0563484	0.0550668	0.645628	1.17359	high
TCGA-55-7576	1.83562	0	0.256609	0.0557272	0.735042	1.24745	high		TCGA-55-6968	3.54247	1	0.0650977	0	0.372938	1.48392	high
TCGA-55-7910	2.84932	0	0	0.0786175	1.15218	0.920436	low		TCGA-95-7043	1.37808	1	0.144829	0	0.207428	1.61778	high
TCGA-05-4427	2.16712	0	0.368387	0	1.89941	1.06755	low		TCGA-50-8457	3.08219	0	0	0.464765	1.60996	0.284573	low
TCGA-49-6742	1.33699	1	0.424753	0.207546	0.811121	0.875396	low		TCGA-62-A470	3.27123	1	0	0.227248	0.66609	0.717015	low
TCGA-97-8172	1.49315	0	0.0654704	0.415878	1.21898	0.376403	low		TCGA-50-5931	1.18904	1	0.0865075	0.08454	2.97355	0.540325	low
TCGA-78-7539	2.16712	0	0.512273	0.0357587	0.524064	1.57453	high		TCGA-69-A59K	1.61918	0	0.151428	0	2.45796	0.816564	low
TCGA-64-5815	2.3726	0	0.0870018	0	0.249212	1.55627	high		TCGA-99-8025	2.90411	0	0	0	0.591731	1.34804	high
TCGA-50-5044	1.70959	1	0.148616	0.072618	0.851406	1.09613	low		TCGA-53-7626	2.54521	1	0.105003	0.0684101	3.30854	0.513618	low
TCGA-62-A46O	3.98356	1	0.448203	0.0625727	1.28385	1.12919	high		TCGA-05-4425	1.83288	0	0.512488	0	0.838853	1.57425	high
TCGA-53-7813	1.16164	0	0	0	0.212412	1.51344	high		TCGA-44-6776	7.16712	0	0.233891	0	0.893292	1.36595	high
TCGA-50-5933	6.55616	1	0.363653	0.213229	0.416665	0.946079	low		TCGA-97-7941	1.32603	0	0.291727	0.285092	2.19355	0.439376	low
TCGA-44-3396	3.09589	0	0.0219242	0	1.69562	0.972095	low		TCGA-91-8496	1.38356	0	0	0.384128	1.31357	0.386597	low
TCGA-97-7554	2.12329	0	0	0.0481972	0.9889	1.04957	low		TCGA-86-7713	3.16986	0	0.150812	0.0368454	1.07998	1.12618	high
TCGA-78-7159	5.40822	0	0.103656	0	0.890748	1.28922	high		TCGA-49-AAR4	2.40822	1	0.233964	0	0.837722	1.38935	high
TCGA-99-AA5R	1.80274	0	0	0.0992605	1.16377	0.867855	low		TCGA-95-7947	1.30685	0	0.57322	0.129273	2.39978	0.710783	low
TCGA-05-4382	1.66301	0	0.3569	0.0747391	0.438137	1.35783	high		TCGA-67-6215	0.476712	0	0.136862	0.0668748	0.490044	1.23631	high
TCGA-95-A4VP	1.65753	0	0.0414418	0	0.118708	1.58664	high		TCGA-44-7661	1.52603	1	0.678452	0.290072	0.728771	0.80666	low
TCGA-73-7499	4.19452	1	0.699835	0.107987	0.422029	1.45647	high		TCGA-44-7662	0.59726	0	0.103321	0.067314	0.591915	1.17914	high
TCGA-91-6849	0.0958904	0	0	0.0885734	0.259618	1.17676	high		TCGA-55-A48X	1.88767	0	0.059019	0.115353	2.02868	0.655617	low
TCGA-38-4631	0.969863	1	1.11488	0	0.798375	2.08985	high		TCGA-55-7570	2.25753	0	0.0999805	0	0.143194	1.61685	high
TCGA-L9-A743	1.81918	0	0.149368	0.0973138	0.855713	1.02497	low
TCGA-86-7711	2.86575	1	0.149914	0	0.515303	1.4761	high
